# Supplementary material for: Moonlighting of Helicobacter pylori catalase protects against complement-mediated killing by utilising the host molecule vitronectin
Source: PubMed Central journal article supplement (PMC4834553; doi:10.1038/srep24391), 2016-04-18
Supplement: srep24391-s1.pdf [file srep24391-s1.pdf]

## ***Supplementary Information***

Moonlighting of *Helicobacter pylori* catalase protects against complement-mediated killing by utilizing the host molecule vitronectin

**Corinna Richter<sup>1</sup>, Oindrilla Mukherjee<sup>1</sup>, David Ermert<sup>2</sup>, Birendra Singh<sup>1</sup>, Yu-Ching Su<sup>1</sup>, Vaibhav Agarwal<sup>2</sup>, Anna M. Blom<sup>2</sup> and Kristian Riesbeck<sup>1\*</sup>**

<sup>1</sup> Clinical Microbiology and <sup>2</sup> Medical Protein Chemistry, Department of Translational Medicine, Lund University, SE-205 02 Malmö, Sweden

Corresponding author: Dr. Kristian Riesbeck, Clinical Microbiology, Department of Translational Medicine, Lund University, Jan Waldenströms gata 59, SE-205 02 Malmö, Sweden. Phone: +46-40-336234. E-mail: [kristian.riesbeck@med.lu.se](mailto:kristian.riesbeck@med.lu.se)

Supplementary Table 1: Correlation of Vn binding and KatA surface exposure

| <b>Strain</b>           | <b>Vn binding (%)</b> |           | <b>anti-KatA binding (%)</b> |           |
|-------------------------|-----------------------|-----------|------------------------------|-----------|
|                         | <b>Mean</b>           | <b>SD</b> | <b>Mean</b>                  | <b>SD</b> |
| CCUG18943               | 91.42                 | 4.89      | 58.36                        | 1.48      |
| KR557                   | 88.13                 | 4.38      | 27.56                        | 15.19     |
| CCUG17875               | 83.73                 | 3.35      | 56.19                        | 13.94     |
| KR560                   | 75.06                 | 5.60      | 59.96                        | 6.59      |
| KR697                   | 69.47                 | 3.07      | 47.34                        | 26.76     |
| KR524                   | 55.20                 | 10.59     | 21.75                        | 2.81      |
| CCUG19106               | 50.60                 | 14.84     | nd                           | nd        |
| KR698                   | 38.38                 | 13        | 6.47                         | 3.88      |
| KR496                   | 33.31                 | 84        | 32.38                        | 16.56     |
| KR558                   | 30.60                 | 1.91      | nd                           | nd        |
| KR549                   | 23.47                 | 3.17      | 23.93                        | 4.71      |
| KR548                   | 18.63                 | 4.27      | 21.07                        | 3.57      |
| KR497                   | 15.20                 | 3.48      | 5.10                         | 0.51      |
| CCUG18943 $\Delta$ katA | na                    | na        | 28.6                         | 6.39      |
| KR697 $\Delta$ katA     | na                    | na        | 9.31                         | 4.12      |
| KR497 $\Delta$ katA     | na                    | na        | 4.96                         | 2.83      |

Supplementary Table 2: Bacterial strains

| Strain                         | Description                                                                                                                                                                                                                          | Reference/ Source                                               |
|--------------------------------|--------------------------------------------------------------------------------------------------------------------------------------------------------------------------------------------------------------------------------------|-----------------------------------------------------------------|
| <b><i>E. coli</i></b>          |                                                                                                                                                                                                                                      |                                                                 |
| DH5 $\alpha$                   | F- $\Phi$ 80 <i>lacZ</i> $\Delta$ M15 $\Delta$ ( <i>lacZYA-argF</i> )<br>U169 <i>recA1 endA1 hsdR17</i> (rK-,<br>mK+) <i>phoA supE44</i> $\lambda$ - <i>thi-1 gyrA96</i><br><i>relA1</i>                                             | Invitrogen                                                      |
| BL21 (DE3)                     | <i>fhuA2 [lon] ompT gal</i> ( $\lambda$ DE3)<br>[ <i>dcm</i> ] $\Delta$ <i>hsdS</i> $\lambda$ DE3 = $\lambda$ <i>sBamHI</i><br><i>o</i> $\Delta$ <i>EcoRI-B</i><br><i>int::(lacI::PlacUV5::T7 gene1) i21</i><br>$\Delta$ <i>nin5</i> | Novagen                                                         |
| <b><i>H. pylori</i></b>        |                                                                                                                                                                                                                                      |                                                                 |
| CCUG18943                      | <i>cagA</i> <sup>+</sup>                                                                                                                                                                                                             | Culture Collection,<br>University of Göteborg,<br>Sweden (CCUG) |
| CCUG18943 $\Delta$ <i>katA</i> | <i>katA</i> deficient CCUG18943                                                                                                                                                                                                      | This study                                                      |
| KR697                          | clinical isolate, <i>cagA</i> <sup>+</sup>                                                                                                                                                                                           | This study                                                      |
| KR697 $\Delta$ <i>katA</i>     | <i>katA</i> deficient KR697                                                                                                                                                                                                          | This study                                                      |
| KR497                          | clinical isolate, <i>cagA</i> <sup>+</sup>                                                                                                                                                                                           | This study                                                      |
| KR497 $\Delta$ <i>katA</i>     | <i>katA</i> deficient KR497                                                                                                                                                                                                          | This study                                                      |
| KR496                          | clinical isolate, <i>cagA</i> <sup>+</sup>                                                                                                                                                                                           | This study                                                      |
| KR524                          | clinical isolate, <i>cagA</i> <sup>+</sup>                                                                                                                                                                                           | This study                                                      |
| KR548                          | clinical isolate, <i>cagA</i> <sup>+</sup>                                                                                                                                                                                           | This study                                                      |
| KR549                          | clinical isolate, <i>cagA</i> <sup>+</sup>                                                                                                                                                                                           | This study                                                      |
| KR557                          | clinical isolate, <i>cagA</i> <sup>+</sup>                                                                                                                                                                                           | This study                                                      |
| KR558                          | clinical isolate, <i>cagA</i> <sup>+</sup>                                                                                                                                                                                           | This study                                                      |
| KR560                          | clinical isolate, <i>cagA</i> <sup>+</sup>                                                                                                                                                                                           | This study                                                      |
| KR698                          | clinical isolate, <i>cagA</i> <sup>+</sup>                                                                                                                                                                                           | This study                                                      |
| CCUG17875                      | <i>cagA</i> <sup>+</sup>                                                                                                                                                                                                             | CCUG                                                            |
| CCUG19106                      | <i>cagA</i> <sup>-</sup>                                                                                                                                                                                                             | CCUG                                                            |

Supplementary Table 3: Primers and plasmids

| <b>Plasmids</b>                   |                                                                           |
|-----------------------------------|---------------------------------------------------------------------------|
| pET26                             | Protein expression vector, Km <sup>R</sup>                                |
| pET26 <i>katA</i>                 | Expression vector for <i>H. pylori</i> CCUG18943 KatA                     |
| pET26 <i>katA</i> 1-49            | Expression vector for <i>H. pylori</i> CCUG18943 KatA aa 1-49 fragment    |
| pET26 <i>katA</i> 51-505          | Expression vector for <i>H. pylori</i> CCUG18943 KatA aa 51-505 fragment  |
| pET26 <i>katA</i> 51-488          | Expression vector for <i>H. pylori</i> CCUG18943 KatA aa 51-488 fragment  |
| pET26 <i>katA</i> 51-400          | Expression vector for <i>H. pylori</i> CCUG18943 KatA aa 51-400 fragment  |
| pET26 <i>katA</i> 350-505         | Expression vector for <i>H. pylori</i> CCUG18943 KatA aa 350-505 fragment |
| <b>Oligonucleotides (5' – 3')</b> |                                                                           |
| <i>katA</i> _for2                 | ATGCCTGACATATGGTTAATAAAGATGTGAAACAAA<br>CCACTGC                           |
| <i>katA</i> _for51                | ATATCTGACATATGCCTGAAAGGGTAGTGCATGCTAA<br>AGGAAGC                          |
| <i>katA</i> _for350               | ATGCCTGACATATGAATTATCCTCAAATACCGGTAA<br>TAAACCAAGA                        |
| <i>katA</i> _for401               | ATGCCTGACATATGAAGTTCAACTTAGCTCATATTGA<br>GAAAGAG                          |
| <i>katA</i> _rev49                | ATCCTGACTCGAGCCTTTCTCTGTCAAACGCTGCTAA<br>CTT                              |
| <i>katA</i> _rev488               | ATTCTGACTCGAGCTTTTGGTGTTTTTCAAGAGCTTTT<br>TAACTCCCTC                      |
| <i>katA</i> _rev505               | ATATGACTCGAGCTTTTTCTTTTTTGTGTGGTGCATGT<br>CTTTTCC                         |
| Kan_F                             | ATGAGCCATATTCAACGGGAAAC                                                   |
| Kan_R                             | TTAGAAAAACTCATCGAGCATCAA                                                  |
| UF_ <i>katA</i> _F1               | GCGTTATCTCGTGTGCATGTTCCAGC                                                |
| UF_ <i>katA</i> _R6_Kan           | TCCCGTTGAATATGGCTCATCTTCTTTTCTTTATTGA<br>TTTAAATTTT                       |
| UF_ <i>katA</i> _R4_Kan           | TCCCGTTGAATATGGCTCATCTTTTTTCTTTATTGA<br>CTTCAAATCT                        |
| DF_ <i>katA</i> _F2_Kan           | TGCTCGATGAGTTTTTCTAACCCTTTTCTTTAAGCGTT<br>CTTATTTTT                       |
| DF_ <i>katA</i> _R2               | ATTCCTAGATTTTCATGCCTTTAGAC                                                |

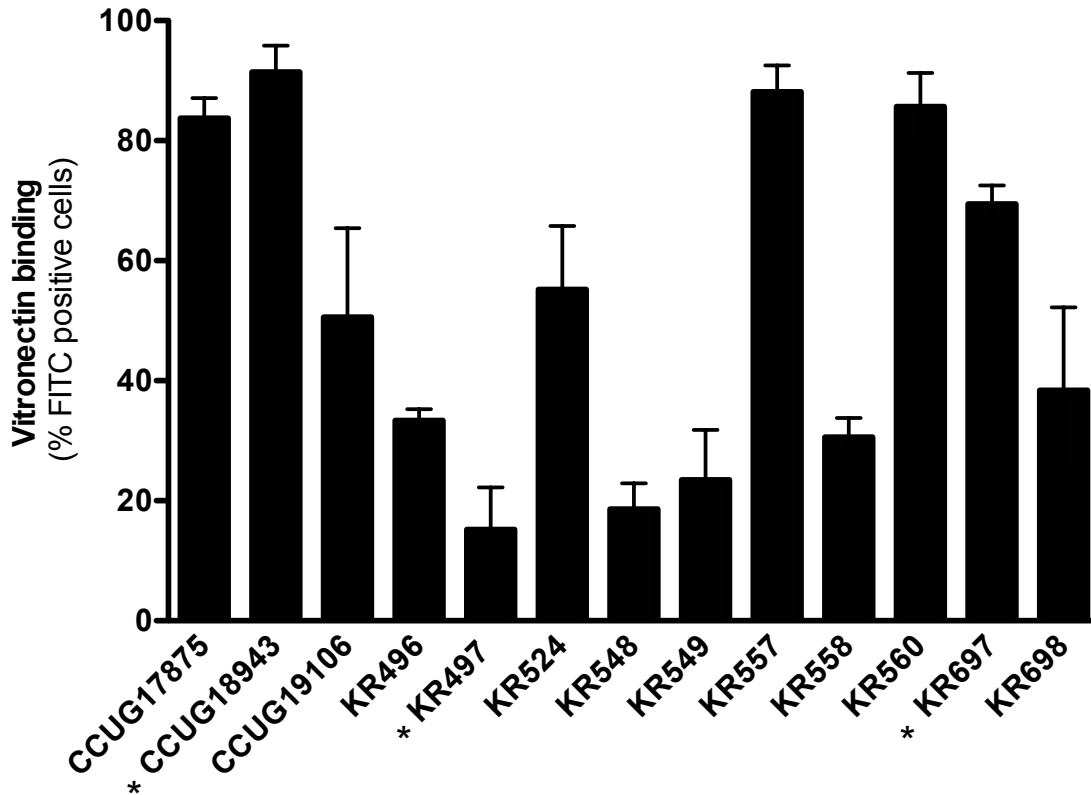

**Supplementary Figure S1. Vitronectin binding differs between *H. pylori* isolates.**

Clinical isolates of *H. pylori* were incubated with 3  $\mu$ g of vitronectin purified from human serum. The percentage of vitronectin-binding was determined by flow-cytometry using FITC-labeled  $\alpha$ -Vn antibody. Data presented are the mean and SD of at least three independent experiments. Asterisks indicate the three strains chosen for further analyses.

|       |                                                               |     |
|-------|---------------------------------------------------------------|-----|
| 18943 | MVNKDVKQTTAFGAPVWDDNNVITAGPRGPVLLQSTWFLEKLAADFDRERIPERVVHAKGS | 60  |
| 697   | MVNKDVKQTTAFGAPVWDDNNVITAGPRGPVLLQSTWFLEKLAADFDRERIPERVVHAKGS | 60  |
| 26695 | MVNKDVKQTTAFGAPVWDDNNVITAGPRGPVLLQSTWFLEKLAADFDRERIPERVVHAKGS | 60  |
| 497   | MVNKDVKQTTAFGAPVWDDNNVITAGPRGPVLLQSTWFLEKLAADFDRERIPERVVHAKGS | 60  |
|       |                                                               |     |
| 18943 | GAYGTFTVTKDITKYTKAKIFSKVGKKTECFFRFSTVAGERGSADAVRDPRGFAMKYYTE  | 120 |
| 697   | GAYGTFTVTKDITKYTKAKIFSKVGKKTECFFRFSTVAGERGSADAVRDPRGFAMKYYTE  | 120 |
| 26695 | GAYGTFTVTKDITKYTKAKIFSKVGKKTECFFRFSTVAGERGSADAVRDPRGFAMKYYTE  | 120 |
| 497   | GAYGTFTVTKDITKYTKAKIFSKVGKKTECFFRFSTVAGERGSADAVRDPRGFAMKYYTE  | 120 |
|       |                                                               |     |
| 8943  | EGNWDLVGNNTPVFFIRDIAIKFPDFIHTQKRDPQTNLPNHDMVWDFWSNVPESLYQVTWV | 180 |
| 697   | EGNWDLVGNNTPVFFIRDIAIKFPDFIHTQKRDPQTNLPNHDMVWDFWSNVPESLYQVTWV | 180 |
| 26695 | EGNWDLVGNNTPVFFIRDIAIKFPDFIHTQKRDPQTNLPNHDMVWDFWSNVPESLYQVTWV | 180 |
| 497   | EGNWDLVGNNTPVFFIRDIAIKFPDFIHTQKRDPQTNLPNHDMVWDFWSNVPESLYQVTWV | 180 |
|       |                                                               |     |
| 18943 | MSDRGIPKSFHRMDGFGSHTFSLINAKGERFVVKFHFETMQGVKHLTNEEAAEIRKYDPP  | 240 |
| 697   | MSDRGIPKSFHRMDGFGSHTFSLINAKGERFVVKFHFETMQGVKHLTNEEAAEVRKYDPP  | 240 |
| 26695 | MSDRGIPKSFHRMDGFGSHTFSLINAKGERFVVKFHFHTMQGVKHLTNEEAAEVRKYDPP  | 240 |
| 497   | MSDRGIPKSFHRMDGFGSHTFSLINAKGERFVVKFHFHTMQGVKHLTNEEAAEIRKHDPP  | 240 |
|       |                                                               |     |
| 18943 | SNQRDLFNAIARGDFPKWKLSIQVMPEEDAKKYRFHPFDVTKIWLQDYPLMEVGIVELN   | 300 |
| 697   | SNQRDLFNAIARGDFPKWKLSIQVMPEEDAKKYRFHPFDVTKIWLQDYPLMEVGIVELN   | 300 |
| 26695 | SNQRDLFNAIARGDFPKWKLSIQVMPEEDAKKYRFHPFDVTKIWLQDYPLMEVGIVELN   | 300 |
| 497   | SNQRDLFNAIARGDFPKWKLSIQVMPEEDAKKYRFHPFDVTKIWLQDYPLMEVGIVELN   | 300 |
|       |                                                               |     |
| 18943 | KNPENYFAEVEQAAFSPANVVPVIGYSPDRMLQGRVLSYGDTHRYRLGVNYPQIPVKNKPR | 360 |
| 697   | KNPENYFAEVEQAAFSPANVVPVIGYSPDRMLQGRVLSYGDTHRYRLGVNYPQIPVKNKPR | 360 |
| 26695 | KNPENYFAEVEQAAFSPANVVPVIGYSPDRMLQGRVLSYGDTHRYRLGVNYPQIPVKNKPR | 360 |
| 497   | KNPENYFAEVEQAAFSPANVVPVIGYSPDRMLQGRVLSYGDTHRYRLGVNYPQIPVKNKPR | 360 |
|       |                                                               |     |
| 18943 | CPFHSSSRDGYMQNGYYGSLQNYTPSSSLPGYKEDKSARDPKFNLAHIEKEFEVWNWDYRA | 420 |
| 697   | CPFHSSSRDGYMQNGYYGSLQNYTPSSSLPGYKEDKSARDPKFNLAHIEKEFEVWNWDYRA | 420 |
| 26695 | CPFHSSSRDGYMQNGYYGSLQNYTPSSSLPGYKEDKSARDPKFNLAHIEKEFEVWNWDYRA | 420 |
| 497   | CPFHSSSRDGYMQNGYYGSLQNYTPSSSLPGYKEDKSARDPKFNLAHIEKEFEVWNWDYRA | 420 |
|       |                                                               |     |
| 18943 | EDSDYYTQPGDYRSLPADEKERLHDTIGESLAHVTHKEIVDKQLEHFKKADPKYAEGVK   | 480 |
| KR697 | EDSDYYTQPGDYRSLPADEKERLHDTIGESLAHVTHKEIVDKQLEHFKKADPKYAEGVK   | 480 |
| 26695 | DDSDYYTQPGDYRSLPADEKERLHDTIGESLAHVTHKEIVDKQLEHFKKADPKYAEGVK   | 480 |
| 497   | DDSDYYTQPGDYRSLPADEKERLHDTIGESLAHVTHKEIVDKQLEHFKKADPKYAEGVK   | 480 |
|       |                                                               |     |
| 18943 | KALEKHQKMMKDMHGKDMHHTKTKK 505                                 |     |
| 697   | KALEKHQKMMKDMHGKDMHHTKTKK 505                                 |     |
| 26695 | KALEKHQKMMKDMHGKDMHHTKTKK 505                                 |     |
| 497   | KALEKHQKMMKDMHGKDMHHTKTKK 505                                 |     |

**Supplementary Figure S2. KatA sequences of strong, intermediate and weak vitronectin binding *H. pylori* strains show only small differences.** KatA amino acid sequences of *H. pylori* CCUG18943, KR697, Hp22965, and KR497 were aligned using Clustal Omega (<http://www.ebi.ac.uk/Tools/msa/clustalo/>). The putative vitronectin-binding site is marked in grey and positions where changes in the amino acid sequence occur are marked in yellow.

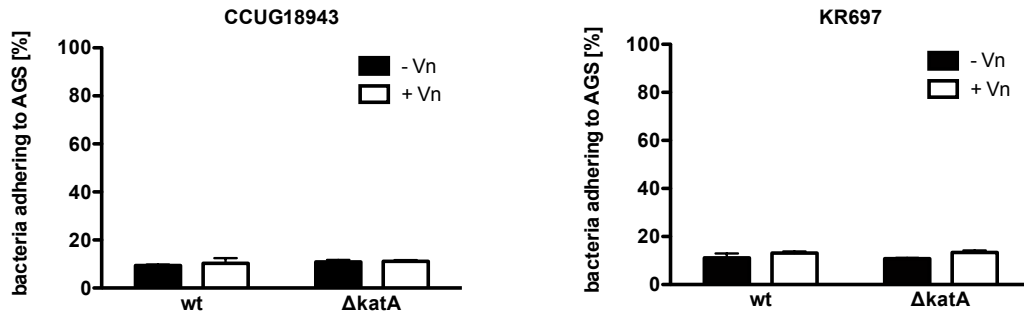

**Supplementary Figure S3. The presence of KatA and vitronectin does not affect adhesion of *H. pylori* to AGS cells.** Gastric adenocarcinoma cells (AGS) were incubated with *H. pylori* at multiplicity of infection (MOI) 100 in the presence or absence of vitronectin. Cells and bacteria were incubated for a period of 3 h, cells were lysed and dilutions of bacteria plated on GC plates for CFU counts. The relative number of bacteria, which attached to the AGS cells is shown. Data presented are the mean and SD of three independent experiments performed in technical triplicate.

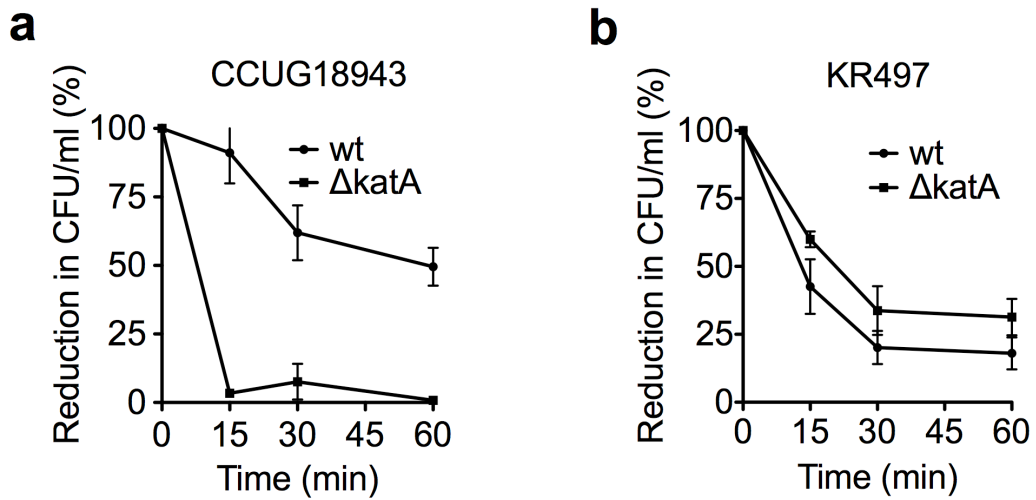

**Supplementary Figure S4: KatA confers increased complement resistance in high-Vn binding strains.** The resistance of CCUG18943 (a) and KR497 (b) wt and  $\Delta katA$  to serum complement was tested in a series of assays using 5% normal human serum (NHS) of donors negative for anti-*H. pylori* IgG. Survival rates at 15, 30 and 60 min after addition of serum were determined by plate count. Depicted is the reduction in CFU/ml in percent. Results are the mean and SE of at least three independent experiments performed in technical duplicate.



## Supplementary Methods

### *H. pylori* adhesion to AGS cells

The human gastric adenocarcinoma cell line (AGS) was maintained in F-12 medium (GIBCO), 10% FBS at 37°C, 5% CO<sub>2</sub>. Cells were routinely subcultured every 2–3 days. AGS cells were seeded into wells of cell culture dishes and grown till confluency and starved overnight prior to infection. Bacteria were grown on GC plates for 72 hours. To observe the effect of vitronectin on adherence of *H. pylori* to AGS cells, serum purified Vitronectin was added at a concentration of 10 µg/ml at 4°C for 1 h followed by two washes prior to the addition of *H. pylori* at an MOI of 1:100. Cells were incubated for a period of 3 hours after infection, washed thoroughly and cells were collected by treatment with citric acid buffer. Cells were then lysed with glass beads, vortexed, and serial dilutions plated on GC agar plates. Colony counts were performed after 72 h incubation.
